# Supplementary material for: Genomic surveillance of invasive Streptococcus pneumoniae isolates in the period pre-PCV10 and post-PCV10 introduction in Brazil
Source: PubMed Central journal article supplement (PMC8627213; doi:10.1099/mgen.0.000635), 2021-10-05
Supplement: mgen-7-0635-s001.pdf [file mgen-7-0635-s001.pdf]

Table S1- Distribution of 466 invasive *S. pneumoniae* isolates with whole-genome sequence data included in the study by the Brazilian States

| States              | Pre-PCV10<br>(2008-2009)<br>N=232 | Post-PCV10<br>(2012-2013)<br>N=234 | Total<br>N=466 |
|---------------------|-----------------------------------|------------------------------------|----------------|
| São Paulo           | 114                               | 135                                | 249            |
| Bahia               | 22                                | 13                                 | 35             |
| Minas Gerais        | 18                                | 12                                 | 30             |
| Paraná              | 15                                | 14                                 | 29             |
| Goiás               | 18                                | 6                                  | 24             |
| Rio Grande do Sul   | 2                                 | 19                                 | 21             |
| Pernambuco          | 7                                 | 5                                  | 12             |
| Ceará               | 4                                 | 7                                  | 11             |
| Amazonas            | 4                                 | 5                                  | 9              |
| Distrito Federal    | 4                                 | 4                                  | 8              |
| Espirito Santo      | 2                                 | 6                                  | 8              |
| Mato Grosso do Sul  | 4                                 | 2                                  | 6              |
| Santa Catarina      | 4                                 | 2                                  | 6              |
| Pará                | 5                                 | 0                                  | 5              |
| Rio de Janeiro      | 3                                 | 1                                  | 4              |
| Rio Grande do Norte | 3                                 | 0                                  | 3              |
| Mato Grosso         | 1                                 | 1                                  | 2              |
| Paraíba             | 1                                 | 1                                  | 2              |
| Acre                | 1                                 | 0                                  | 1              |
| Alagoas             | 0                                 | 1                                  | 1              |

Table S2. *S. pneumoniae* invasive isolates (N=466) by age groups, clinical diagnosis, and vaccine periods, Brazil

| Age group        | Epidemiologic data  | Vaccine period                    |                                    | Total<br>N=466 |
|------------------|---------------------|-----------------------------------|------------------------------------|----------------|
|                  |                     | Pre-PCV10<br>(2008-2009)<br>N=232 | Post-PCV10<br>(2012-2013)<br>N=234 |                |
| Age <5 years old | Total               | 155 (100%)                        | 155 (100%)                         | 310            |
|                  | Mean age            | 1.2 years old<br>(1 month-4 year) | 1.5 years old<br>(1 month-4 year)  | -              |
|                  | Clinical diagnosis: |                                   |                                    |                |
|                  | Meningitis          | 85 (55%)                          | 66 (43%)                           | 151            |
|                  | Bacteremia          | 27 (17%)                          | 51 (33%)                           | 78             |
|                  | Pneumonia           | 43 (28%)                          | 37 (24%)                           | 80             |
|                  | Abscess             | 0                                 | 1 (1%)                             | 1              |
| Age ≥5 years old | Total               | 77 (100%)                         | 79 (100%)                          | 156            |
|                  | Mean age            | 36 years old<br>(5-97 years)      | 44 years old<br>(5-96 years)       | -              |
|                  | Clinical diagnosis: |                                   |                                    |                |
|                  | Meningitis          | 52 (68%)                          | 29 (37%)                           | 81             |
|                  | Bacteremia          | 16 (21%)                          | 37 (47%)                           | 53             |
| Pneumonia        | 9 (12%)             | 13 (16%)                          | 22                                 |                |

Table S3 – Distribution of predicted serotypes, sequence type (ST), and GPSC by age group and vaccine period for 466 sampled invasive isolates from Brazil

| Serotype (n) | ST      | GPSC <sup>a</sup> | Age <5 years      |                    | Age ≥5 years     |                   | Total (N=466) |
|--------------|---------|-------------------|-------------------|--------------------|------------------|-------------------|---------------|
|              |         |                   | Pre-PCV10 (n=155) | Post-PCV10 (n=155) | Pre-PCV10 (n=77) | Post-PCV10 (n=79) |               |
| 1 (6)        | 304     | 31                | 3                 | 0                  | 2                | 0                 | 5             |
|              | 615     | 2                 | 0                 | 0                  | 0                | 1                 | 1             |
| 3 (39)       | 180     | 12                | 4                 | 7                  | 9                | 6                 | 26            |
|              | 232     | 83                | 0                 | 0                  | 3                | 0                 | 3             |
|              | 260     | 83                | 0                 | 0                  | 1                | 0                 | 1             |
|              | 458     | 51                | 1                 | 5                  | 0                | 1                 | 7             |
|              | 11332   | 51                | 0                 | 2                  | 0                | 0                 | 2             |
| 4 (9)        | 770     | 249               | 0                 | 1                  | 3                | 2                 | 6             |
|              | 7026    | 70                | 0                 | 0                  | 2                | 0                 | 2             |
|              | 12500   | 249               | 1                 | 0                  | 0                | 0                 | 1             |
| 5 (10)       | 289     | 8                 | 3                 | 2                  | 0                | 5                 | 10            |
| 6A (19)      | 471     | 13                | 0                 | 0                  | 1                | 0                 | 1             |
|              | 473     | 13                | 0                 | 2                  | 0                | 0                 | 2             |
|              | 724     | 231               | 0                 | 1                  | 0                | 0                 | 1             |
|              | 1876    | 13                | 0                 | 1                  | 0                | 1                 | 2             |
|              | 3787    | 391               | 2                 | 0                  | 0                | 0                 | 2             |
|              | 4269    | 213               | 0                 | 1                  | 0                | 0                 | 1             |
|              | 4598    | 24                | 1                 | 1                  | 1                | 0                 | 3             |
|              | 5833    | 382               | 1                 | 0                  | 0                | 0                 | 1             |
|              | 5847    | 231               | 0                 | 0                  | 1                | 0                 | 1             |
|              | 11305   | 23                | 1                 | 0                  | 0                | 0                 | 1             |
|              | 11310   | 29                | 0                 | 1                  | 0                | 0                 | 1             |
|              | 11312   | 393               | 0                 | 1                  | 0                | 0                 | 1             |
|              | 13833   | 391               | 0                 | 0                  | 0                | 1                 | 1             |
|              | 13870   | 393               | 0                 | 1                  | 0                | 0                 | 1             |
|              | 6B (36) | 90                | 23                | 5                  | 0                | 0                 | 0             |
| 315          |         | 47                | 3                 | 1                  | 0                | 0                 | 4             |
| 386          |         | 47                | 2                 | 0                  | 0                | 0                 | 2             |
| 497          |         | 13                | 1                 | 0                  | 0                | 0                 | 1             |
| 724          |         | 231               | 3                 | 2                  | 0                | 1                 | 6             |
| 750          |         | 37                | 1                 | 0                  | 0                | 0                 | 1             |
| 751          |         | 37                | 2                 | 1                  | 0                | 0                 | 3             |
| 4977         |         | 37                | 0                 | 1                  | 0                | 0                 | 1             |
| 4978         |         | 37                | 2                 | 1                  | 0                | 0                 | 3             |
| 5847         |         | 231               | 1                 | 0                  | 0                | 0                 | 1             |
| 11315        |         | 47                | 0                 | 0                  | 1                | 0                 | 1             |
| 11787        |         | 37                | 0                 | 1                  | 0                | 0                 | 1             |
| 12465        |         | 231               | 0                 | 0                  | 1                | 0                 | 1             |
| 12495        |         | 23                | 1                 | 0                  | 0                | 0                 | 1             |
| 12514        |         | 37                | 1                 | 0                  | 0                | 0                 | 1             |
| 12841        |         | 37                | 1                 | 0                  | 0                | 0                 | 1             |
| 13866        |         | 115               | 1                 | 0                  | 0                | 0                 | 1             |
| 13872        |         | 231               | 0                 | 0                  | 0                | 1                 | 1             |
| 14471        |         | 811               | 1                 | 0                  | 0                | 0                 | 1             |
| 6C (10)      |         | 386               | 47                | 0                  | 5                | 0                 | 0             |
|              | 1390    | 111               | 0                 | 1                  | 0                | 0                 | 1             |
|              | 2777    | 5                 | 0                 | 2                  | 0                | 1                 | 3             |
|              | 3930    | 178               | 0                 | 1                  | 0                | 0                 | 1             |

| Serotype (n) | ST    | GPSC <sup>a</sup> | Age <5 years      |                    | Age ≥5 years     |                   | Total (N=466) |
|--------------|-------|-------------------|-------------------|--------------------|------------------|-------------------|---------------|
|              |       |                   | Pre-PCV10 (n=155) | Post-PCV10 (n=155) | Pre-PCV10 (n=77) | Post-PCV10 (n=79) |               |
| 7C (3)       | 737   | 16                | 1                 | 2                  | 0                | 0                 | 3             |
| 7F (15)      | 191   | 15                | 4                 | 2                  | 5                | 4                 | 15            |
| 8 (10)       | 53    | 3                 | 0                 | 1                  | 1                | 6                 | 8             |
|              | 404   | 98                | 1                 | 0                  | 0                | 0                 | 1             |
|              | 12574 | 3                 | 0                 | 1                  | 0                | 0                 | 1             |
| 9N (11)      | 66    | 16                | 0                 | 4                  | 1                | 6                 | 11            |
| 9V (10)      | 156   | 6                 | 0                 | 2                  | 1                | 2                 | 5             |
|              | 162   | 6                 | 0                 | 1                  | 2                | 0                 | 3             |
|              | 280   | 43                | 0                 | 1                  | 0                | 0                 | 1             |
|              | 13929 | 61                | 0                 | 1                  | 0                | 0                 | 1             |
| 10A (4)      | 742   | 311               | 0                 | 3                  | 0                | 0                 | 3             |
|              | 13930 | 311               | 0                 | 1                  | 0                | 0                 | 1             |
| 11A (8)      | 62    | 3                 | 0                 | 2                  | 1                | 3                 | 6             |
|              | 4883  | 269               | 0                 | 0                  | 0                | 1                 | 1             |
|              | 13871 | 11                | 0                 | 1                  | 0                | 0                 | 1             |
| 12F (16)     | 218   | 32                | 1                 | 6                  | 3                | 4                 | 14            |
|              | 8102  | 575               | 0                 | 0                  | 0                | 1                 | 1             |
|              | 8376  | 289               | 0                 | 0                  | 1                | 0                 | 1             |
| 13 (6)       | 761   | 392               | 0                 | 1                  | 0                | 0                 | 1             |
|              | 11327 | 289               | 1                 | 1                  | 0                | 2                 | 4             |
|              | 12476 | 392               | 0                 | 0                  | 1                | 0                 | 1             |
| 14 (90)      | 15    | 18                | 1                 | 0                  | 0                | 0                 | 1             |
|              | 66    | 16                | 5                 | 2                  | 2                | 0                 | 9             |
|              | 156   | 6                 | 41                | 12                 | 7                | 5                 | 65            |
|              | 796   | 571               | 1                 | 0                  | 0                | 0                 | 1             |
|              | 1556  | 6                 | 1                 | 0                  | 0                | 0                 | 1             |
|              | 2335  | 6                 | 1                 | 0                  | 0                | 0                 | 1             |
|              | 12487 | 16                | 2                 | 0                  | 0                | 0                 | 2             |
|              | 12505 | 6                 | 1                 | 0                  | 0                | 0                 | 1             |
|              | 12506 | 6                 | 2                 | 0                  | 0                | 0                 | 2             |
|              | 12507 | 6                 | 1                 | 0                  | 0                | 0                 | 1             |
|              | 12508 | 6                 | 1                 | 0                  | 0                | 0                 | 1             |
|              | 12837 | 16                | 1                 | 0                  | 0                | 0                 | 1             |
|              | 12839 | 6                 | 1                 | 0                  | 0                | 0                 | 1             |
|              | 13931 | 18                | 0                 | 1                  | 0                | 0                 | 1             |
|              | 13932 | 6                 | 0                 | 1                  | 0                | 0                 | 1             |
| 13933        | 6     | 0                 | 1                 | 0                  | 0                | 1                 |               |
| 15A (12)     | 63    | 9                 | 0                 | 0                  | 0                | 1                 | 1             |
|              | 67    | 16                | 1                 | 0                  | 0                | 0                 | 1             |
|              | 73    | 16                | 0                 | 0                  | 1                | 2                 | 3             |
|              | 1228  | 11                | 0                 | 1                  | 0                | 0                 | 1             |
|              | 2216  | 16                | 0                 | 1                  | 0                | 0                 | 1             |
|              | 4913  | 16                | 0                 | 3                  | 0                | 0                 | 3             |
|              | 10404 | 702               | 0                 | 1                  | 0                | 0                 | 1             |
|              | 13878 | 16                | 0                 | 0                  | 0                | 1                 | 1             |
| 15B/15C (7)  | 199   | 4                 | 0                 | 1                  | 0                | 0                 | 1             |
|              | 338   | 5                 | 0                 | 1                  | 0                | 0                 | 1             |
|              | 766   | 131               | 1                 | 1                  | 0                | 0                 | 2             |
|              | 1262  | 11                | 0                 | 1                  | 0                | 0                 | 1             |
|              | 13869 | 131               | 0                 | 0                  | 0                | 1                 | 1             |
|              | 13875 | 131               | 0                 | 0                  | 0                | 1                 | 1             |

| Serotype (n) | ST    | GPSC <sup>a</sup> | Age <5 years      |                    | Age ≥5 years     |                   | Total (N=466) |
|--------------|-------|-------------------|-------------------|--------------------|------------------|-------------------|---------------|
|              |       |                   | Pre-PCV10 (n=155) | Post-PCV10 (n=155) | Pre-PCV10 (n=77) | Post-PCV10 (n=79) |               |
| 16F (8)      | 2258  | 18                | 0                 | 0                  | 2                | 0                 | 2             |
|              | 7027  | 18                | 1                 | 1                  | 0                | 0                 | 2             |
|              | 7438  | 386               | 0                 | 0                  | 0                | 1                 | 1             |
|              | 12836 | 18                | 0                 | 0                  | 1                | 0                 | 1             |
|              | 13867 | 18                | 0                 | 1                  | 0                | 0                 | 1             |
|              | 14432 | 18                | 0                 | 1                  | 0                | 0                 | 1             |
| 17F (2)      | 739   | 49                | 0                 | 2                  | 0                | 0                 | 2             |
| 18A (6)      | 241   | 95                | 1                 | 2                  | 0                | 2                 | 5             |
|              | 5063  | 95                | 0                 | 0                  | 1                | 0                 | 1             |
| 18B (3)      | 193   | 11                | 2                 | 0                  | 0                | 0                 | 2             |
|              | 2814  | 11                | 0                 | 1                  | 0                | 0                 | 1             |
| 18C (14)     | 193   | 11                | 7                 | 0                  | 2                | 1                 | 10            |
|              | 280   | 43                | 0                 | 1                  | 0                | 0                 | 1             |
|              | 1358  | 11                | 1                 | 0                  | 0                | 0                 | 1             |
|              | 12517 | 11                | 0                 | 0                  | 1                | 0                 | 1             |
|              | 12838 | 11                | 1                 | 0                  | 0                | 0                 | 1             |
| 19A (37)     | 199   | 4                 | 0                 | 1                  | 0                | 0                 | 1             |
|              | 202   | 1                 | 1                 | 0                  | 0                | 0                 | 1             |
|              | 276   | 10                | 0                 | 2                  | 1                | 0                 | 3             |
|              | 320   | 1                 | 2                 | 10                 | 0                | 1                 | 13            |
|              | 667   | 4                 | 1                 | 0                  | 0                | 0                 | 1             |
|              | 733   | 18                | 1                 | 0                  | 2                | 0                 | 3             |
|              | 1118  | 204               | 2                 | 2                  | 0                | 0                 | 4             |
|              | 1451  | 1                 | 0                 | 1                  | 0                | 0                 | 1             |
|              | 2878  | 204               | 2                 | 1                  | 0                | 0                 | 3             |
|              | 2880  | 204               | 1                 | 1                  | 0                | 0                 | 2             |
|              | 8640  | 341               | 1                 | 1                  | 0                | 0                 | 2             |
|              | 9793  | 341               | 1                 | 0                  | 0                | 0                 | 1             |
|              | 9838  | 204               | 0                 | 1                  | 0                | 0                 | 1             |
|              | 9942  | 204               | 1                 | 0                  | 0                | 0                 | 1             |
| 19F (13)     | 66    | 16                | 1                 | 0                  | 0                | 0                 | 1             |
|              | 89    | 198               | 0                 | 1                  | 0                | 0                 | 1             |
|              | 177   | 44                | 1                 | 0                  | 1                | 0                 | 2             |
|              | 236   | 1                 | 2                 | 0                  | 0                | 0                 | 2             |
|              | 2307  | 10                | 0                 | 1                  | 0                | 0                 | 1             |
|              | 3013  | 44                | 0                 | 0                  | 1                | 0                 | 1             |
|              | 11326 | 1                 | 1                 | 0                  | 0                | 0                 | 1             |
|              | 11328 | 577               | 0                 | 1                  | 0                | 0                 | 1             |
|              | 12510 | 44                | 1                 | 0                  | 0                | 0                 | 1             |
|              | 12512 | 44                | 1                 | 0                  | 0                | 0                 | 1             |
| 12513        | 44    | 0                 | 0                 | 1                  | 0                | 1                 |               |
| 20 (1)       | 1030  | 124               | 0                 | 0                  | 1                | 0                 | 1             |
| 20B (5)      | 1030  | 124               | 0                 | 3                  | 0                | 2                 | 5             |
| 22F (8)      | 214   | 61                | 0                 | 0                  | 0                | 1                 | 1             |
|              | 6403  | 61                | 0                 | 5                  | 1                | 1                 | 7             |
| 23A (4)      | 42    | 7                 | 0                 | 0                  | 0                | 2                 | 2             |
|              | 13873 | 5                 | 0                 | 1                  | 0                | 0                 | 1             |
|              | 13874 | 7                 | 0                 | 0                  | 0                | 1                 | 1             |
| 23B (4)      | 727   | 7                 | 0                 | 0                  | 1                | 1                 | 2             |
|              | 945   | 7                 | 1                 | 1                  | 0                | 0                 | 2             |

| Serotype<br>(n) | ST    | GPSC <sup>a</sup> | Age <5 years         |                       | Age ≥5 years        |                      | Total<br>(N=466) |
|-----------------|-------|-------------------|----------------------|-----------------------|---------------------|----------------------|------------------|
|                 |       |                   | Pre-PCV10<br>(n=155) | Post-PCV10<br>(n=155) | Pre-PCV10<br>(n=77) | Post-PCV10<br>(n=79) |                  |
| 23F (20)        | 81    | 16                | 1                    | 0                     | 1                   | 0                    | 2                |
|                 | 242   | 14                | 0                    | 1                     | 0                   | 0                    | 1                |
|                 | 338   | 5                 | 5                    | 4                     | 3                   | 1                    | 13               |
|                 | 353   | 113               | 1                    | 0                     | 0                   | 0                    | 1                |
|                 | 735   | 573               | 1                    | 0                     | 0                   | 0                    | 1                |
|                 | 3163  | 5                 | 0                    | 0                     | 1                   | 0                    | 1                |
|                 | 12835 | 5                 | 0                    | 0                     | 1                   | 0                    | 1                |
| 24 (4)          | 72    | 16                | 0                    | 2                     | 0                   | 0                    | 2                |
|                 | 230   | 10                | 0                    | 1                     | 0                   | 0                    | 1                |
|                 | 12840 | 16                | 0                    | 0                     | 1                   | 0                    | 1                |
| 28A (2)         | 494   | 191               | 0                    | 0                     | 2                   | 0                    | 2                |
| 29 (3)          | 5406  | 394               | 1                    | 1                     | 0                   | 1                    | 3                |
| 33B (1)         | 14437 | 139               | 0                    | 0                     | 0                   | 1                    | 1                |
| 34 (1)          | 743   | 45                | 0                    | 0                     | 0                   | 1                    | 1                |
| 35B (2)         | 4877  | 574               | 0                    | 0                     | 0                   | 1                    | 1                |
|                 | 14531 | 574               | 0                    | 1                     | 0                   | 0                    | 1                |
| 35C (1)         | 13868 | 61                | 0                    | 0                     | 0                   | 1                    | 1                |
| 38 (5)          | 393   | 38                | 0                    | 3                     | 0                   | 0                    | 3                |
|                 | 755   | 38                | 1                    | 1                     | 0                   | 0                    | 2                |
| 40 (1)          | 12483 | 16                | 0                    | 0                     | 1                   | 0                    | 1                |

<sup>a</sup>Black, GPSCs previously described by GPS project; red, Brazilian GPSCs 204, 231, 249, 289, 311, 341, 392-394, 571, 573-575, 577, 702 and 811 (n=16); and blue, globally-spreading lineages recognized in the previous GPS study GPSCs 1, 6, 7, 12, 16, 18, 23 and 32 (n=8).

Table S4. PBP types, associated serotypes, and genetic structure of the five most frequent PBP allele combination with the prediction of MIC  $\geq 0.125\text{mg L}^{-1}$  by age groups in the post-PCV10 period (N=234)

| Rank | Age <5 years old      |    |                       |                   | Age $\geq 5$ years old |   |                       |              |
|------|-----------------------|----|-----------------------|-------------------|------------------------|---|-----------------------|--------------|
|      | PBP type (1A--2B--2X) | n  | Serotype <sup>a</sup> | GPSC (CC)         | PBP type (1A--2B--2X)  | n | Serotype <sup>a</sup> | GPSC         |
| 1st  | 13--11--16            | 11 | 19A                   | 1 (CC320)         | 15--12--18             | 4 | 14, 9V                | 6 (CC156)    |
| 2nd  | 15--12--18            | 7  | 14, 9V                | 6 (CC156)         | 45--12--63             | 3 | 14                    | 6 (CC156)    |
| 3rd  | 2--53--77             | 6  | 6C, 6B                | 47 (ST386, CC315) | 0--1--1                | 1 | 23F                   | 5 (CC172)    |
|      |                       |    |                       |                   | 13--11--16             | 1 | 19A                   | 1 (CC320)    |
|      |                       |    |                       |                   | 2--1--1                | 1 | 6C                    | 5 (CC172)    |
|      |                       |    |                       |                   | 24--27--28             | 1 | 15A                   | 9 (CC63)     |
|      |                       |    |                       |                   | 36--34--44             | 1 | 6A                    | 13 (CC473)   |
|      |                       |    |                       |                   | 7--1--300              | 1 | 16F                   | 386 (ST7438) |
| 4th  | 45--12--63            | 5  | 14                    | 6 (CC156)         |                        |   |                       |              |
| 5th  | 0--1--1               | 3  | 23F                   | 5 (CC172)         |                        |   |                       |              |
|      | 2--168--265           | 3  | 19A                   | 204 (CC62)        |                        |   |                       |              |
|      | 36--34--44            | 3  | 6A                    | 13 (CC473)        |                        |   |                       |              |

<sup>a</sup>Black, VT or PCV10 serotypes; blue, NVT additional PCV13 serotypes; and red, NVT non-PCV serotypes.

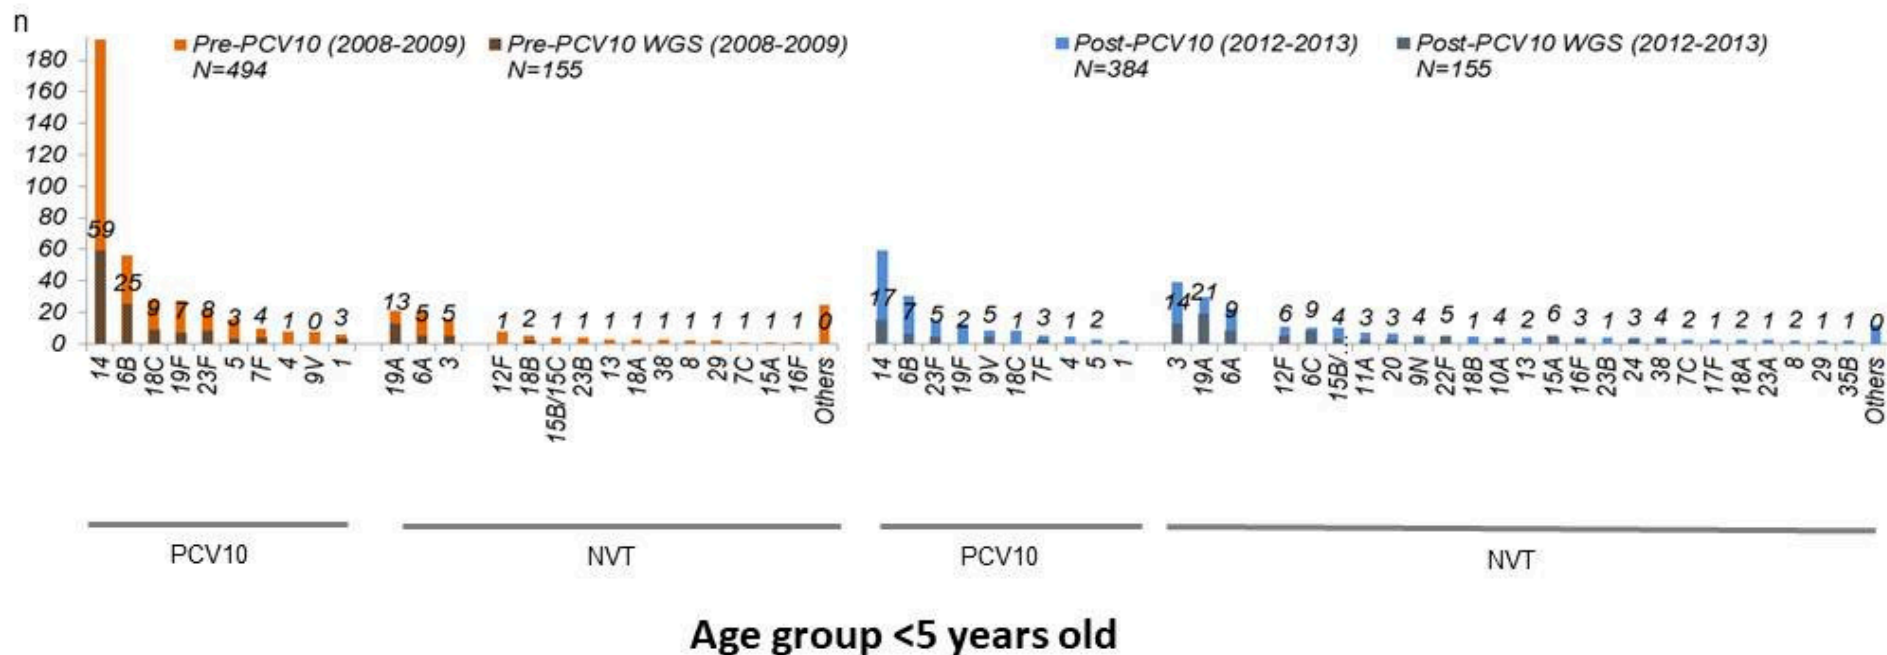

Fig. S1. Distribution of total number of isolates from children <5 years old by serotypes obtained in the laboratory-based surveillance (N=878) compared with the number of isolates characterized by WGS (N=310) in the pre-PCV10 (2008-2009) and post-PCV10 (2012-2013) periods. The numbers indicate the isolates sequenced within each serotype; Others (non-PCV serotypes and non-WGS selected isolates: pre-PCV10 period (n=25) serotypes: 6C (n=4), 35B (n=3), 10A (n=2), 17F (n=2), 20 (n=2), 22F (n=2), 9N (n=1), 11A (n=1), 18F (n=1), 24F (n=1), 35F (n=1) and NT (n=5) and in the post-PCV10 period (n=13) serotypes: 25A (n=3), 11B (n=2), 28A (n=2), 35F (n=2), 10F (n=1), 18F (n=1), 31 (n=1) and 40 (n=1). The NVT is the non-vaccine serotypes including the additional PCV13 serotypes 3, 6A and 19A.



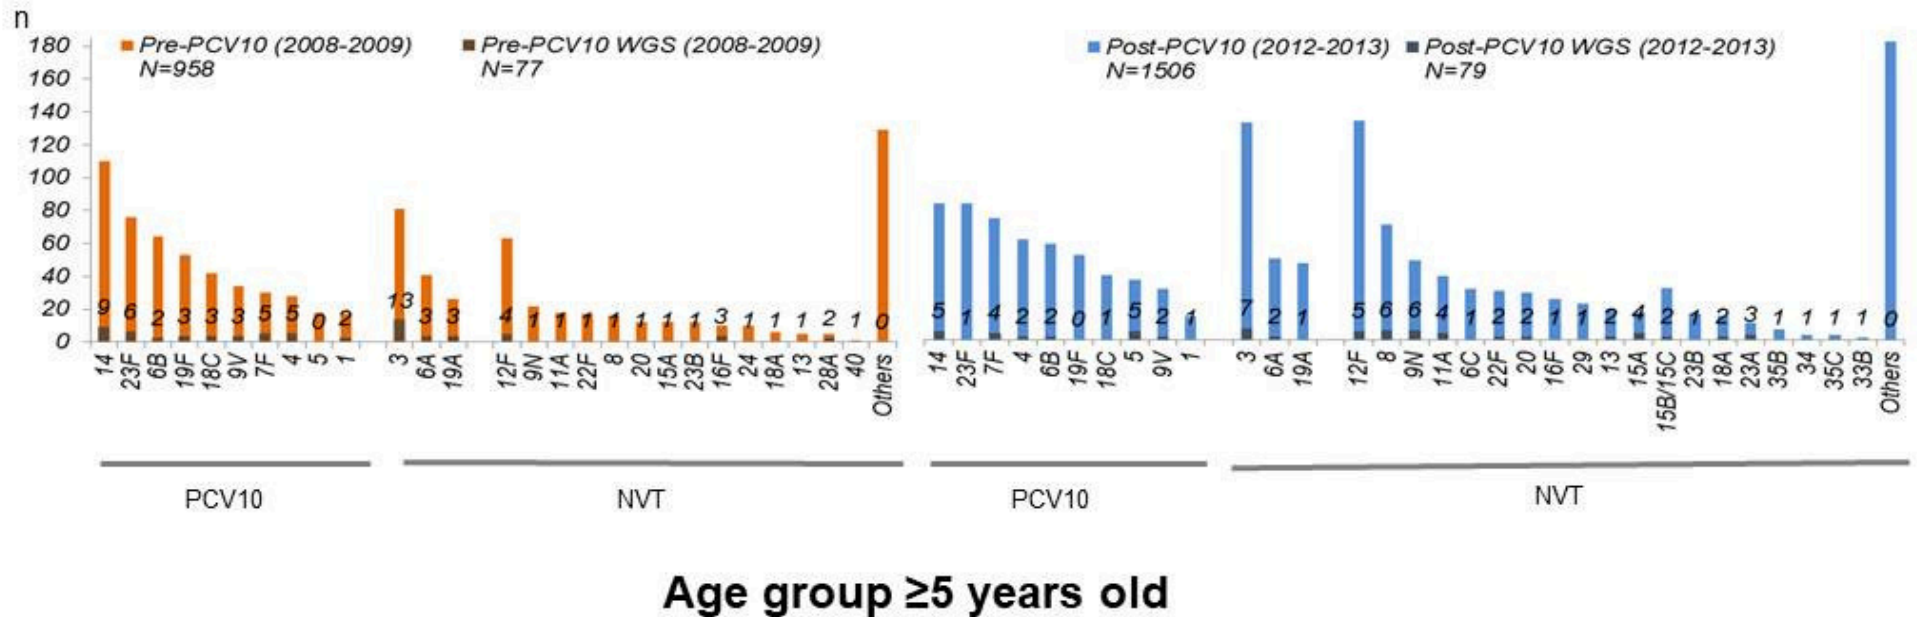

Fig. S2. Distribution of total number of isolates from children  $\geq 5$  years old by serotypes obtained in the laboratory-based surveillance (N=2,464) compared with the number of isolates characterized by WGS (N=156) in the pre-PCV10 (2008-2009) and post-PCV10 (2012-2013) periods. The numbers indicate the isolates sequenced within each serotype; Others (non-PCV serotypes and non-WGS selected isolates: pre-PCV10 period (n=129) serotypes: 15B/15C (n=21), 6C (n=11), 18B (n=11), 10A (n=9), 7C (n=7), 17F (n=7), 35B (n=6), 35F (n=6), 23A (n=5), 34 (n=5), 29 (n=4), 38 (n=4), 21 (n=2), 7A (n=1), 7B (n=1), 11F (n=1), 28F (n=1), 31 (n=1), 33F (n=1), 35A (n=1), 35C (n=1), NT (n=18) and not serotyped (n=5) and in the post-PCV10 period (n=184) serotypes: 10A (n=35), 17F (n=25), 25A (n=23), 35F (n=20), 7C (n=19), 24F (n=14), 18B (n=13), 31 (n=8), 28A (n=6), 11B (n=3), 21 (n=3), 10F (n=2), 35A (n=2), 40 (n=2), 42 (n=2), 11F (n=1), 19B (n=1) and NT (n=5). The NVT is the non-vaccine serotypes including the additional PCV13 serotypes 3, 6A and 19A.

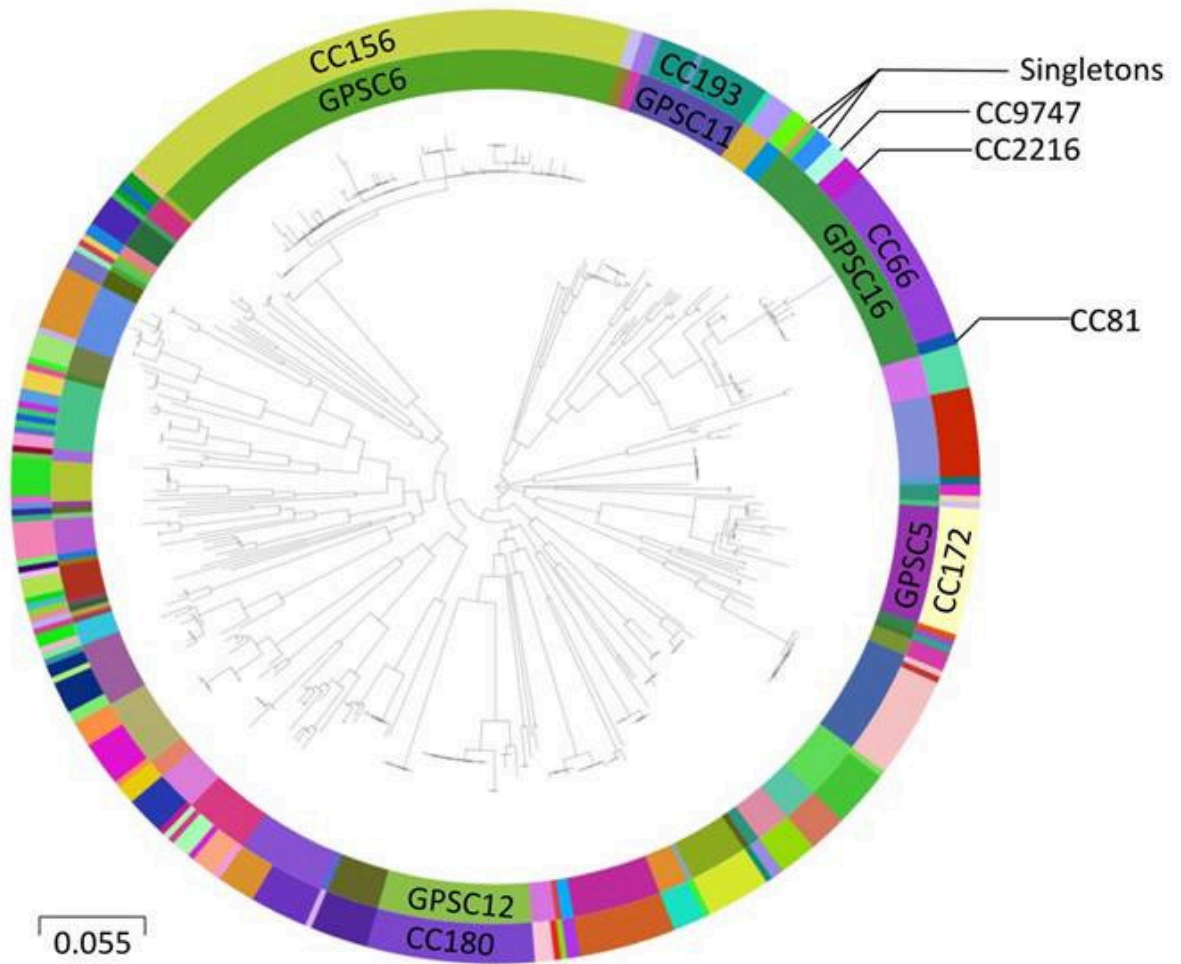

Fig. S3. Phylogeny of 466 studied pneumococcal isolates. The inner ring shows the global pneumococcal sequence clusters (GPSCs) and outer ring clonal complex (CC). The five most predominant GPSCs were labeled. This figure can be visualized at [https://microreact.org/project/GPS\\_Brazil/fd82d3a9](https://microreact.org/project/GPS_Brazil/fd82d3a9).

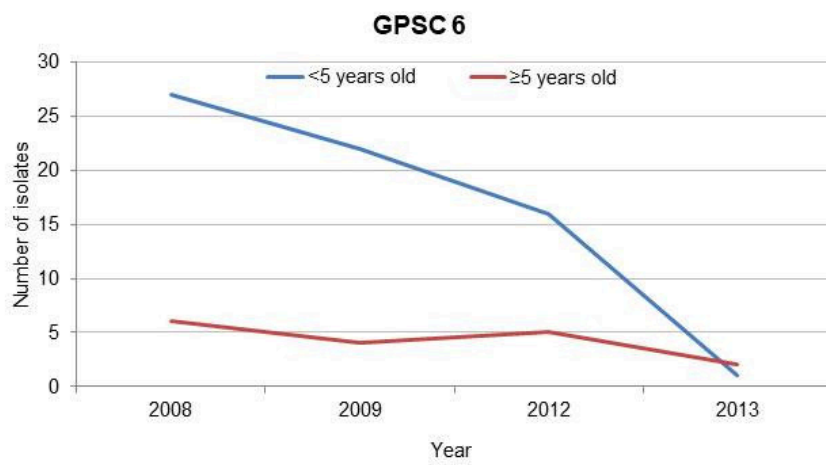

Fig. S4. GPSC6 (CC156) isolates over the study years stratified by age groups.
